# Supplementary material
Source: MDPI journal article supplement (https://www.mdpi.com/1996-1073/14/10/2916)

# Species Glossary

| Formula         | Structure                                                                            |
|-----------------|--------------------------------------------------------------------------------------|
| $C_4H_7$ 1-3    |    |
| $C_5H_9$ 1-3    |    |
| $C_6H_{11}$ 1-3 |  |
| $C_4H_6$        |  |
| $C_5H_8$        |  |
| $C_6H_{10}$     |  |

Supplement: s1 [file s1]
